# Supplementary material
Source: HighWire-hosted journal article supplement (https://ajnr-sso.highwirestaging.com/highwire/filestream/78018/field_highwire_adjunct_files/0/20-00285.pdf)
Supplement: 20-00285.pdf [file 20-00285.pdf]

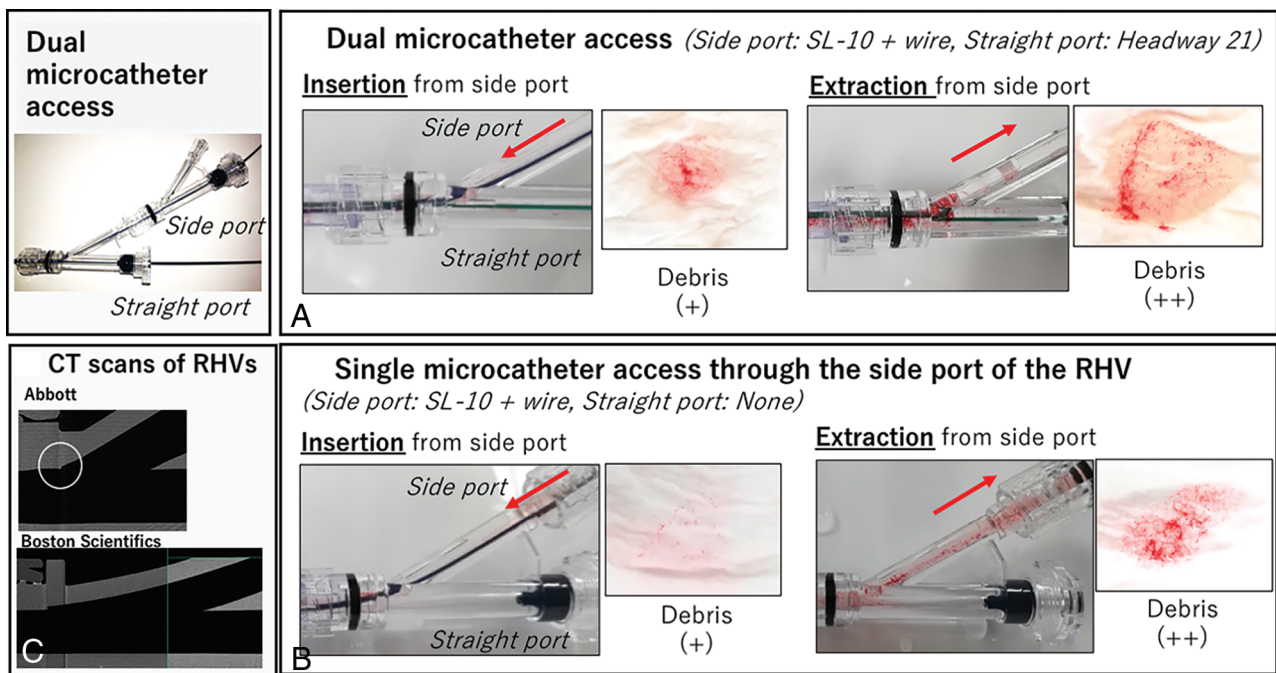

**ON-LINE FIG 1.** Dual-microcatheter access (A) and single-microcatheter access through the side port of the RHV (B). C, Details of both RHV side-to-main port junction areas show a ledge (circle) inside the Abbott model.

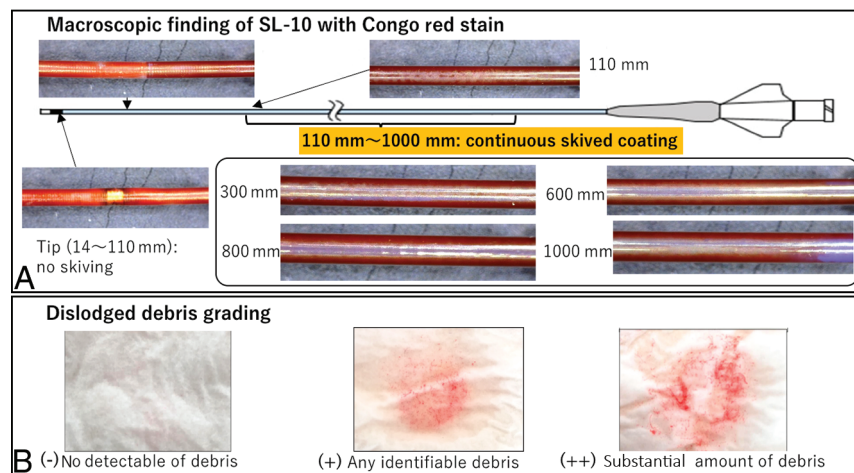

**ON-LINE FIG 2.** Macroscopic finding of the SL-10 with Congo red stain (A) and dislodged debris grading (B).
